# Supplementary material for: Using data-driven sublanguage pattern mining to induce knowledge models: application in medical image reports knowledge representation
Source: BMC Med Inform Decis Mak. 2018 Jul 6;18:61. doi: 10.1186/s12911-018-0645-3 (PMC6035419; doi:10.1186/s12911-018-0645-3)
Supplement: Supplementary file 1 — Annotation manua. Annotation manual includes definitions of 14 semantic categories. It was used for evaluation of knowledge model. (XLSX 22 kb) [file 12911_2018_645_MOESM1_ESM.xlsx]

## Sheet: Readme
Evaluation Overview
We first performed a quantitative evaluation of the coverage of the semantic role labels using a manually created label definition and reference standard. 20 eligibility criteria were randomly selected from http://radiopedia.org. Then, they were decomposed into 100 sentence segments based on the consensus of two raters. Each rater received an annotation manual that provided definitions of each se…
Evaluation Process
Further split sentences by clause, and, -, / ...
Tags are provided as a hint, but are subject to change. The 10 composite tags are listed in "Manual" table with descriptions of their subtag definition from UMLS. 4 original tags definition are also included.
Ignore subjective such as "Netonate", "Patient" (age group, patient group, Biomedical Occupation or Discipline, Professional or Occupational Group, Population Group, etc...) but count as a correct tag
Examine if the tags are tagged correctly, if not, please correct it. If you see any phrase/word that should be tagged but doesn't have a tag, please tag it yourself, and error+1
If tag in the sentence isn't involve in relation, then simply count as a correct tag, and tagnotinclude+1
Delete verb tags except for cases when it is in ing or past-tense format, such as preventing, observed (Functional Concept)
Same relation in one sentence is counted as once (Knowledge template relations are listed in "Relation" table)
Tip: Count by [] using word

## Sheet: Manual
	Physiology				Pathology
T043	Cell Function	A physiologic function inherent to cells or cell components.	Cell Cycle; Cell Division; Erythrocyte Aggregation; Phagocytosis	T047	Disease or Syndrome	A condition which alters or interferes with a normal process, state, or activity of an organism. It is usually characterized by the abnormal functioning of one or more of the host's systems, parts, or organs. Included here is a complex of symptoms descriptive of a disorder.	Diabetes Mellitus; Dumping Syndrome; Malabsorption Syndromes; Nephrotic Syndrome
T042	Organ or Tissue Function	A physiologic function of a particular organ, organ system, or tissue.	Osteogenesis; Renal Circulation; Tooth Calcification	T191	Neoplastic Process	A new and abnormal growth of tissue in which the growth is uncontrolled and progressive. The growths may be malignant or benign.	Abdominal Neoplasms; stage IVB vaginal cancer; tonsillar lymphoepithelioma
T040	Organism Function	A physiologic function of the organism as a whole, of multiple organ systems, or of multiple organs or tissues.	Breeding; Hibernation; Homeostasis; High altitude acclimation	T048	Mental or Behavioral Dysfunction	A clinically significant dysfunction whose major manifestation is behavioral or psychological. These dysfunctions may have identified or presumed biological etiologies or manifestations.	Agoraphobia; Cyclothymic Disorder; Hallucinations; Memory Disorders
T039	Physiologic Function	A normal process, activity, or state of the body.		T049	Cell or Molecular Dysfunction	A pathologic function inherent to cells, parts of cells, or molecules.	DNA Damage; Wallerian Degeneration; Atypical squamous metaplasia
				T046	Pathologic Function	A disordered process, activity, or state of the organism as a whole, of a body system or systems, or of multiple organs or tissues. Included here are normal responses to a negative stimulus as well as patholologic conditions or states that are less specific than a disease. Pathologic functions frequently have systemic effects.	Inflammation; Leukopenia; Shock; Abnormal general body function
	Body Part				Observation
T023	Body Part, Organ, or Organ Component	A collection of cells and tissues which are localized to a specific area or combine and carry out one or more specialized functions of an organism. This ranges from gross structures to small components of complex organs. These structures are relatively localized in comparison to tissues.	Femur; Kidney Glomerulus; Pulmonary Artery; Articular cartilage of distal tibia	T033	Finding	That which is discovered by direct observation or measurement of an organism attribute or condition, including the clinical history of the patient. The history of the presence of a disease is a 'Finding' and is distinguished from the disease itself.	Birth History; Downward displacement of diaphragm; Decreased capillary fragility; Absent tendon reflex
T031	Body Substance	Extracellular material, or mixtures of cells and extracellular material, produced, excreted, or accreted by the body. Included here are substances such as saliva, dental enamel, sweat, and gastric acid.	Amniotic Fluid; Saliva; Bronchial washings	T184	Sign or Symptom	An observable manifestation of a disease or condition based on clinical judgment, or a manifestation of a disease or condition which is experienced by the patient and reported as a subjective observation.	Dyspnea; Nausea; Pain; Pallor; Homans' sign
T024	Tissue	An aggregation of similarly specialized cells and the associated intercellular substance. Tissues are relatively non-localized in comparison to body parts, organs or organ components.	Basophilic muscle fibers; Cartilage; Endothelium; Epidermis	T037	Injury or Poisoning	A traumatic wound, injury, or poisoning caused by an external agent or force.	Abdominal Injuries; Carbon Monoxide Poisoning; Frostbite; Snake Bites; Accident caused by bench saw
T025	Cell	The fundamental structural and functional unit of living organisms.	Dendritic Cells; Erythrocytes; Histiocytes	T034	Laboratory or Test Result	The outcome of a specific test to measure an attribute or to determine the presence, absence, or degree of a condition.	Forced Expiratory Volume; Abnormal skin pH; Blood carbon monoxide level; Serum sodium level
T028	Gene or Genome	A specific sequence, or in the case of the genome the complete sequence, of nucleotides along a molecule of DNA or RNA (in the case of some viruses) which represent the functional units of heredity.	Genes, Structural; Genome, Human; c-Ha-ras Genes	T067	Phenomenon or Process	A process or state which occurs naturally or as a result of an activity.	Disasters; Motor Traffic Accidents; Depolymerization
T022	Body System	A complex of anatomical structures that performs a common function.	Limbic System; Renin-Angiotensin System; Reticuloendothelial System; Skeleton
T192	Receptor	A specific structure or site on the cell surface or within its cytoplasm that recognizes and binds with other specific molecules. These include the proteins on the surface of an immunocompetent cell that binds with antigens, or proteins found on the surface molecules that bind with hormones or neurotransmitters and react with other molecules that respond in a specific way.	Adenosine A2 Receptor; Antigen p150,95; T-Cell Receptors alpha-Chain
	Medical Activity				Abnormality
T060	Diagnostic Procedure	A procedure, method, or technique used to determine the nature or identity of a disease or disorder. This excludes procedures which are primarily carried out on specimens in a laboratory.	Heart Auscultation; Tomography, X-Ray Computed; Biopsy of skin; Acoustic rhinometry	T190	Anatomical Abnormality	An abnormal structure, or one that is abnormal in size or location.
T061	Therapeutic or Preventive Procedure	A procedure, method, or technique designed to prevent a disease or a disorder, or to improve physical function, or used in the process of treating a disease or injury.	Cesarean Section; Hemodialysis; Vaccine Therapy	T020	Acquired Abnormality	An abnormal structure, or one that is abnormal in size or location, found in or deriving from a previously normal structure. Acquired abnormalities are distinguished from diseases even though they may result in pathological functioning (e.g., "hernias incarcerate").	Hemorrhoids; Hernia, Femoral; Varicose Veins; Abscess of prostate
T059	Laboratory Procedure	A procedure, method, or technique used to determine the composition, quantity, or concentration of a specimen, and which is carried out in a clinical laboratory. Included here are procedures which measure the times and rates of reactions.	Blood Protein Electrophoresis; Radioimmunoassay; Atherogenic index calculation	T019	Congenital Abnormality	An abnormal structure, or one that is abnormal in size or location, present at birth or evolving over time as a result of a defect in embryogenesis.	Cleft Palate; Gastroschisis; Acrosyndactyly of the fingers
T058	Health Care Activity	An activity of or relating to the practice of medicine or involving the care of patients.	Ambulatory Care; Clinic Activities; Geriatric Nursing; Preventive Health Services
T062	Research Activity	An activity carried out as part of research or experimentation.	Animal Experimentation; Biomedical Research; Experimental Replication
	Location				Substance
T082	Spatial Concept	A location, region, or space, generally having definite boundaries.	Mandibular Rest Position; Lateral; Bicoronal	T121	Pharmacologic Substance	A substance used in the treatment or prevention of pathologic disorders. This includes substances that occur naturally in the body and are administered therapeutically.	Antiemetics; Cardiovascular Agents; Codeine; Morphine Sulfate
T029	Body Location or Region	An area, subdivision, or region of the body demarcated for the purpose of topographical description.	Forehead; Base of left lung; Anterior chest wall; Lateral surface of thumb; Lower anterior segment of dental arch	T167	Substance	A material with definite or fairly definite chemical composition.	Air; Foreign Bodies; Fossils; Copper dust
T030	Body Space or Junction	An area enclosed or surrounded by body parts or organs or the place where two anatomical structures meet or connect.	Knee Joint; Peritoneal Cavity; Synapses; Canal of Hering; Held's space	T123	Biologically Active Substance	A generally endogenous substance produced or required by an organism, of primary interest because of its role in the biologic functioning of the organism that produces it.	Enzyme Precursors; Gastric Acid; Growth Substances
				T122	Biomedical or Dental Material	A substance used in biomedicine or dentistry predominantly for its physical, as opposed to chemical, properties. Included here are biocompatible materials, tissue adhesives, bone cements, resins, toothpastes, etc.	Anion Exchange Resins; Bone Cements; Dental Casting Investment; Elastosil
	Functional Concept				Medical Device and Object
T169	Functional Concept	A concept which is of interest because it pertains to the carrying out of a process or activity.	Interviewer Effect; Problem Formulation; Endogenous; Responsive	T074	Medical Device	A manufactured object used primarily in the diagnosis, treatment, or prevention of physiologic or anatomic disorders.	Bone Screws; Obstetrical Forceps; Oxygenators; Infusion Pumps, Multichannel
	NO	Created by Professor Luo		T073	Manufactured Object	A physical object made by human beings.	Car Seats; Cooking and Eating Utensils; Bulldozer; Air freshener
	Original
T079	Temporal Concept	A concept which pertains to time or duration.	Birth Intervals; Half-Life; Postimplantation Phase; Postoperative Period; Puerperium
T185	Classification	A term or system of terms denoting an arrangement by class or category.	Chemicals and Drugs (MeSH Category); Axis I; Gleason grade 2; C1 certainty
T080	Qualitative Concept	A concept which is an assessment of some quality, rather than a direct measurement.	Clinical Competence; Consumer Satisfaction; Esthetics, Dental; Health Status
T081	Quantitative Concept	A concept which involves the dimensions, quantity or capacity of something using some unit of measure, or which involves the quantitative comparison of entities.	Age Distribution; Body Height; Metric System; Secretory Rate
